# Supplementary material
Source: publisher figshare collection journal article supplement (https://acs.figshare.com/ndownloader/files/5840439)
Supplement: Supplementary file 1 [file 5840439]

## SUPPORTING INFORMATION

New Stereoselective  $\beta$ -C-Glycosidation by Uncatalyzed 1,4-Addition of Organolithium Reagents to a Glycal-derived Vinyl Oxirane

Valeria Di Bussolo, Micaela Caselli, Mauro Pineschi and Paolo Crotti\*

*Dipartimento di Chimica Bioorganica e Biofarmacia  
Università di Pisa, Via Bonanno 33,  
56126 Pisa, Italy*

**General Procedures.** All reactions were performed in flame-dried modified Schlenk (Kjeldahl shape) flasks fitted with a glass stopper or rubber septa under a positive pressure of argon. Air/and moisture-sensitive liquids and solutions were transferred via a syringe. Organic solutions were dried on  $\text{MgSO}_4$  and concentrated by a rotary evaporator below  $40^\circ\text{C}$  at *ca.* 25 Torr. Flash column chromatography was performed employing 230-400 mesh silica gel. Analytical TLC was performed on Alugram SIL G/UV254 silica gel sheets (Macherey-Nagel) with detection by 0.5% phosphomolybdic acid solution in 95% EtOH.

In the reactions carried out under *protocol A*, hydroxy mesylate **3** was pretreated with *t*-BuOK. In the reactions carried out under *protocol B*, hydroxy mesylate **3** was not pretreated with *t*-BuOK.

**Materials.** 1.0 M TBAF in THF, 3.0 M EtMgBr in Et<sub>2</sub>O, 2.0 M PhMgCl in THF, 1.6 M MeLi in Et<sub>2</sub>O, 1.6 M BuLi in hexane, 1.7 M *t*-BuLi in pentane, 0.7 M *i*-PrLi in pentane, 1.8 M PhLi in Et<sub>2</sub>O, 3.0 M MeMgBr in Et<sub>2</sub>O, and *tert*-BuOK were purchased from Aldrich and used without purification. Benzene, benzene-d<sub>6</sub>, Et<sub>2</sub>O and tetrahydrofuran were distilled from sodium/benzophenone.

**Instrumentation.** Infrared (IR) spectra were obtained using a Mattson 3000 FTIR spectrophotometer. Data are presented as frequency of absorption ( $\text{cm}^{-1}$ ). Proton and carbon-13 nuclear magnetic resonance ( $^1\text{H}$  NMR and  $^{13}\text{C}$  NMR) spectra were recorded on a Bruker AC 200 (50 MHz) spectrometer; chemical shifts are expressed in parts per million ( $\delta$  scale) downfield from tetramethylsilane and refer to residual protium in the NMR solvent ( $\text{CHCl}_3$ :  $\delta$  7.26,  $\text{CHD}_2\text{OD}$ : 3.31,  $\text{C}_6\text{HD}_5$ :  $\delta$  7.16). Data are presented as follows: chemical shift, multiplicity (s=singlet, d=doublet, t=triplet, m=multiplet and/or multiple resonances),

coupling constant (or  $W_{1/2}$ ) in Hertz (Hz), integration. Melting points were recorded with a Kofler melting point apparatus and are uncorrected.

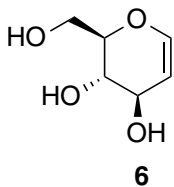

**D-Glucal (6).**<sup>1</sup> Sodium methoxide (0.10 g, 1.80 mmol) was added to a solution of tri-*O*-acetyl-D-glucal (**5**) (8.0 g, 29.4 mmol) in MeOH (80 mL) and the resulting reaction mixture was stirred at rt for 5 h. Evaporation of the organic solvent afforded a product (4.15 g, 97% yield) consisting of **6**, practically pure as a solid, mp 46-48°C:  $R_f$  = 0.27 (9:1 CH<sub>2</sub>Cl<sub>2</sub>/MeOH); <sup>1</sup>H NMR (CD<sub>3</sub>OD)  $\delta$  6.26 (dd,  $J$  = 6.0, 1.6 Hz, 1H), 4.60 (dd,  $J$  = 6.0, 2.2 Hz, 1H), 4.04 (dt,  $J$  = 7.0, 1.9 Hz, 1H), 3.85-3.58 (m, 3H), 3.48 (dd,  $J$  = 9.5, 7.0 Hz, 1H). <sup>13</sup>C NMR (CD<sub>3</sub>OD)  $\delta$  146.49, 106.09, 81.86, 72.53, 72.13, 63.84

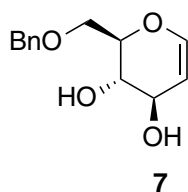

**6-*O*-(benzyl)-D-glucal (7).**<sup>2</sup> A 1M solution of LHMDS in THF (36.1 mL, 36.1 mmol) was added dropwise at -40°C to a stirred solution of D-glucal (**6**) (4.80 g, 32.9 mmol) in anhydrous DMF (97 mL). BrBn (3.91 mL 32.9 mmol) was added and the reaction mixture was stirred for 6 h allowing the temperature to rise to 0°C. Saturated aqueous NH<sub>4</sub>Cl (25 mL) and AcOEt (100mL) were added to the reaction mixture. The organic layer was separated and the aqueous layer extracted with AcOEt (3x25 mL). Combined organic extracts were washed (saturated aqueous NaCl and water) and evaporated to afford a crude product which was subjected to flash chromatography. Elution with 1:1 hexane/AcOEt afforded the benzyl derivative **7** (2.45 g, 32% yield), pure as a solid, mp 38-40°C:  $R_f$  = 0.19 (1:1 hexane/AcOEt); FTIR (neat film) 3385, 1647, 1263, 1057 cm<sup>-1</sup>. <sup>1</sup>H NMR (CDCl<sub>3</sub>)  $\delta$  7.24-7.31 (m, 5H), 6.20 (dd,  $J$  = 6.0, 1.5 Hz, 1H), 4.57 (dd,  $J$  = 6.0, 1.8 Hz, 1H), 4.52 (d,  $J$  = 12.0 Hz, 1H), 4.46 (d,  $J$  = 12.0 Hz, 1H), 4.05-4.17 (m, 1H), 3.57-3.84 (m, 4H). <sup>13</sup>C NMR (CDCl<sub>3</sub>)  $\delta$  143.89, 137.37, 128.15, 127.48, 102.53, 77.44, 73.40, 70.02, 69.50, 68.80.

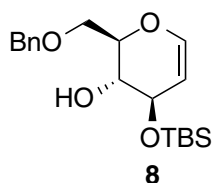

**3-*O*-(*t*-Butyldimethylsilyl)-6-*O*-(benzyl)-D-glucal (8).** A solution of diol **7** (2.40 g, 10.2 mmol) in anhydrous DMF (24 mL) containing imidazole (1.34 g, 20.4 mmol) was treated at 0°C with TBDMS-Cl (1.54 g, 10.2 mmol) and the reaction mixture was stirred 18 h at rt. Dilution with Et<sub>2</sub>O (80 mL) and evaporation of the washed (saturated aqueous NaCl and water) organic solution afforded a crude product (3.47 g) which was subjected to flash chromatography. Elution with 9:1 hexane/AcOEt afforded alcohol **8** (3.0 g, 84% yield), as a liquid: *R*<sub>f</sub> = 0.33 (9:1 hexane/AcOEt); FTIR (neat film) 3393, 1647, 1447, 1248, 1095 cm<sup>-1</sup>. <sup>1</sup>H NMR (CDCl<sub>3</sub>) δ 7.24-7.32 (m, 5H), 6.28 (d, *J* = 6.0 Hz, 1H), 4.58-4.63 (m, 3H), 4.19 (d, *J* = 6.0 Hz, 1H), 3.92-3.99 (m, 1H), 3.71-3.79 (m, 3H), 0.87 (s, 9H), 0.084 (s, 6H). <sup>13</sup>C NMR (CDCl<sub>3</sub>) δ 143.52, 138.06, 128.56, 127.90, 103.70, 77.1, 73.81, 70.95, 70.03, 69.42, 25.96, 18.22, -4.27. Anal.Calcd for C<sub>19</sub>H<sub>30</sub>O<sub>4</sub>Si: C, 65.10; H, 8.63. Found: C, 64.97; H, 8.51.

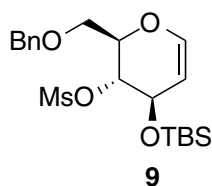

**3-*O*-(*t*-Butyldimethylsilyl)-4-*O*-mesyl-6-*O*-(benzyl)-D-glucal (9).** A solution of alcohol **8** (1.20 g, 3.42 mmol) in anhydrous pyridine (15 mL) was treated at 0°C with MsCl (0.53 mL, 6.84 mmol). The reaction mixture was stirred 18 h at rt, then diluted with Et<sub>2</sub>O. Evaporation of the washed (water) organic layer afforded a residue which was subjected to flash chromatography. Elution with 9:1 hexane/AcOEt yielded mesylate **9** (1.07 g, 72% yield), pure as a liquid, *R*<sub>f</sub> = 0.11 (9:1 hexane/AcOEt); FTIR (neat film) 1647, 1361, 1253, 1176, 1072 cm<sup>-1</sup>. <sup>1</sup>H NMR (CDCl<sub>3</sub>) δ 7.24-7.32 (m, 5H), 6.37 (d, *J* = 6.4 Hz, 1H), 4.71-4.81 (m, 2H) 4.61 (d, *J* = 12.3 Hz, 1H), 4.52 (d, *J* = 12.3 Hz, 1H), 4.22-4.42 (m, 2H), 3.81 (dd, *J* = 11.0, 7.0 Hz, 1H), 3.69 (dd, *J* = 11.0, 3.5 Hz, 1H), 3.05 (s, 3H), 0.86 (s, 9H), 0.09 (s, 6H). <sup>13</sup>C NMR (CDCl<sub>3</sub>) δ 143.48, 137.65, 128.41, 127.86, 127.74, 101.49, 77.35, 75.48, 73.66, 67.97, 64.79, 38.97, 25.86, 18.04, -4.48. Anal.Calcd for C<sub>20</sub>H<sub>32</sub>O<sub>6</sub>SSi: C, 56.05; H, 7.52. Found: C, 54.72; H, 7.18.

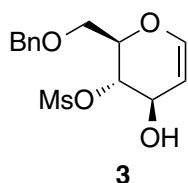

**6-O-(Benzyl)-4-O-Mesyl D-glucal (3).** A solution of mesylate **9** (0.50 g, 1.17 mmol) in anhydrous THF (40 mL) was treated dropwise at 0°C with 1M TBAF in THF (1.17 mL, 1.17 mmol) and the reaction mixture was stirred for 20 min at the same temperature, then diluted with water (15 mL) and extracted with Et<sub>2</sub>O (2 x 50 mL). Evaporation of the combined ether extracts afforded a residue (0.33 g) which was subjected to flash chromatography. Elution with 1: 1 hexane/AcOEt afforded hydroxy mesylate **3** (0.27 g, 74% yield), pure as a solid, mp 39-41°C: R<sub>f</sub> = 0.29 (1:1 hexane/AcOEt); FTIR (neat film) 3447, 1649, 1348, 1182 cm<sup>-1</sup>. <sup>1</sup>H NMR (CDCl<sub>3</sub>) δ 7.28-7.39 (m, 5H), 6.43 (dd, *J* = 6.0, 1.5 Hz, 1H), 4.78-4.90 (m, 2H), 4.61 (s, 2H), 4.42-4.51 (m, 1H), 4.11 (dt, *J* = 9.3, 3.4 Hz, 1H), 3.81-3.85 (m, 2H), 3.14 (s, 3H). <sup>13</sup>C NMR (CDCl<sub>3</sub>) δ 144.43, 137.47, 128.43, 127.97, 127.85, 102.03, 79.06, 75.13, 73.74, 68.11, 67.19, 38.63. Anal.Calcld for C<sub>14</sub>H<sub>18</sub>O<sub>6</sub>S: C, 53.49; H, 5.77. Found: C, 53.17; H, 5.54.

#### <sup>1</sup>H NMR confirmation of the formation of epoxide **4**.

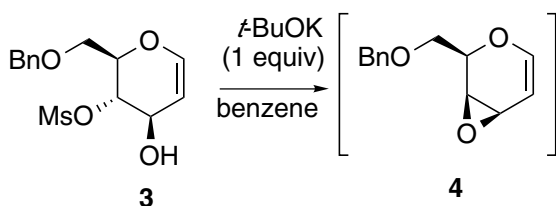

A solution of hydroxy mesylate **3** (0.020 g, 0.064 mmol) in C<sub>6</sub>D<sub>6</sub> (0.7 mL) was treated in the NMR tube with *t*-BuOK (0.007 g, 0.064 mmol). After 15 min at rt, the <sup>1</sup>H NMR analysis showed pure epoxide **4**: <sup>1</sup>H NMR δ 7.24-7.07 (m, 5H), 6.07 (dd, *J* = 6.0, 1.5 Hz, 1H), 4.74 (dd, *J* = 6.0, 4.0 Hz, 1H), 4.26 (s, 2H), 4.02 (td, *J* = 6.5, 1.0 Hz, 1H), 3.62 (unresolved d, *J* = 6.6 Hz, 2H), 3.20 (dd, *J* = 4.6, 1.0 Hz, 1H), 2.78 (td, *J* = 4.2, 1.5 Hz, 1H).

#### Reaction of Hydroxy Mesylate **3** with MeMgBr (*Protocol B*)

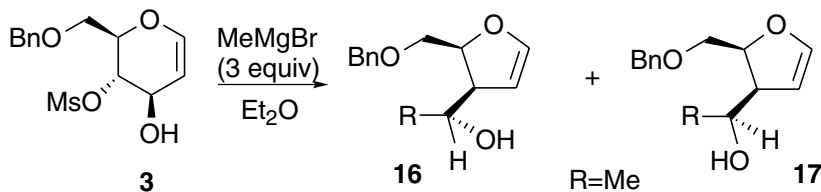

*Typical procedure.* A solution of hydroxy mesylate **3** (0.050 g, 0.16 mmol) in anhydrous Et<sub>2</sub>O (2 mL) was treated at 0°C with 3 M MeMgBr in Et<sub>2</sub>O (0.16 mL, 0.48 mmol) and the

resulting reaction mixture was stirred at rt for 18 h. Dilution with Et<sub>2</sub>O and evaporation of the washed (saturated aqueous NaCl) organic solution afforded a crude product consisting of a 1:1 mixture of alcohols **16** and **17** (R=Me) (<sup>1</sup>H NMR) (0.036 g, 95% yield) which was subjected to flash chromatography. Elution with 1:1 hexane/AcOEt afforded pure alcohols **16** (or **17**, R=Me) (0.016 g) and **17** (or **16**, R=Me) (0.012 g).

**(4S,5S)-5-(Benzyloxymethyl)-4-[(R or S)-1-hydroxyethyl]-4,5-dihydrofuran** (**16** or **17**, R=Me), a liquid: R<sub>f</sub> = 0.44 (6:4 hexane/AcOEt); FTIR (neat film) 3435, 1643, 1446, 1375, 1284, 1071 cm<sup>-1</sup>. <sup>1</sup>H NMR (CDCl<sub>3</sub>) δ 7.27-7.38 (m, 5H), 6.38 (t, *J* = 2.5 Hz, 1H), 4.77 (t, *J* = 2.5 Hz, 1H), 4.57-4.69 (m, 1H), 4.61 (s, 2H), 3.58-3.74 (m, 1H), 3.64 (dd, *J* = 9.8, 6.1 Hz, 1H), 3.49 (dd, *J* = 9.8, 5.5 Hz, 1H), 2.72 (tt, *J* = 6.4, 2.3 Hz, 1H), 1.17 (d, *J* = 6.4 Hz, 1H). <sup>13</sup>C NMR (CDCl<sub>3</sub>) δ 146.99, 137.98, 128.65, 127.96, 100.36, 82.42, 73.68, 72.35, 70.07, 53.93, 20.98. Anal.Calcd for C<sub>14</sub>H<sub>18</sub>O<sub>3</sub>: C 71.77; H, 7.74. Found: C, 71.79; H, 7.92.

**(4S,5S)-5-(Benzyloxymethyl)-4-[(S or R)-1-hydroxyethyl]-4,5-dihydrofuran** (**17** or **16**, R=Me), a liquid: R<sub>f</sub> = 0.38 (6:4 hexane/AcOEt); FTIR (neat film) 3416, 1639, 1460, 1371, 1074 cm<sup>-1</sup>. <sup>1</sup>H NMR (CDCl<sub>3</sub>) δ 7.27-7.39 (m, 5H), 6.42 (t, *J* = 2.3 Hz, 1H), 4.86 (t, *J* = 2.5 Hz, 1H), 4.54-4.65 (m, 1H), 4.63 (d, *J* = 12.2 Hz, 1H), 4.57 (d, *J* = 12.2 Hz, 1H), 3.66-3.78 (m, 1H), 3.60 (dd, *J* = 10.2, 6.5 Hz, 1H), 3.46 (dd, *J* = 10.2, 4.9 Hz, 1H), 2.78-2.89 (m, 1H), 1.15 (d, *J* = 6.4 Hz, 3H). <sup>13</sup>C NMR (CDCl<sub>3</sub>) δ 147.53, 138.29, 128.64, 127.92, 98.58, 82.15, 73.69, 72.27, 69.24, 52.78, 20.87. Anal.Calcd for C<sub>14</sub>H<sub>18</sub>O<sub>3</sub>: C, 71.77; H, 7.74. Found: C, 71.49; H, 7.43.

### Reaction of Hydroxy Mesylate **3** with PhMgBr (*Protocol B*)

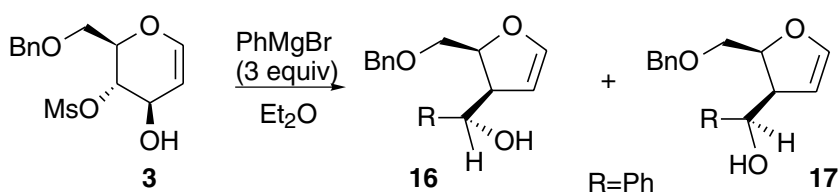

Proceeding as previously described for the corresponding reaction with MeMgBr, the reaction of hydroxy mesylate **3** (0.050 g, 0.16 mmol) in anhydrous Et<sub>2</sub>O (2 mL) with 1 M PhMgBr in Et<sub>2</sub>O (prepared from PhBr and Mg) (0.48 mL, 0.48 mmol) afforded a crude product consisting of a 1:1 mixture of alcohols **16** and **17** (R=Ph) (<sup>1</sup>H NMR) (0.040 g, 84% yield) which was subjected to flash chromatography. Elution with 6:4 hexane/AcOEt afforded pure alcohols **16** (or **17**, R=Ph) (0.018 g) and **17** (or **16**, R=Ph) (0.015 g).

**(4S,5S)-5-(Benzyloxymethyl)-4-[(S or R)-phenylhydroxymethyl]-4,5-dihydrofuran** (**16** or **17**, R=Ph), a liquid: R<sub>f</sub> = 0.44 (6:4 hexane/AcOEt); FTIR (neat film) 3406, 1616,

1452, 1263, 1074, 1028 cm<sup>-1</sup>. <sup>1</sup>H NMR (CDCl<sub>3</sub>) δ 7.21-7.45 (m, 10H), 6.36 (t, *J* = 2.3 Hz, 1H), 4.74 (dd, *J* = 11.5, 6.3 Hz, 1H), 4.48-4.63 (m, 2H), 4.56 (s, 2H), 3.52 (dd, *J* = 10.0, 6.3 Hz, 1H), 3.40 (dd, *J* = 10.0, 5.0 Hz, 1H), 3.08 (tt, *J* = 6.9, 2.0 Hz, 1H). <sup>13</sup>C NMR (CDCl<sub>3</sub>) δ 147.12, 142.33, 137.97, 128.58, 127.86, 127.63, 126.39, 125.55, 100.31, 82.76, 76.38, 73.52, 72.16, 54.12. Anal.Calcd for C<sub>19</sub>H<sub>20</sub>O<sub>3</sub>: C, 77.00; H, 6.80. Found: C, 77.19; H, 6.54.

**(4*S*,5*S*)-5-(Benzyloxymethyl)-4-[(*R* or *S*)-phenylhydroxymethyl]-4,5-dihydrofuran (17 or 16, *R*=Ph)**, a liquid: *R*<sub>f</sub> = 0.38 (6:4 hexane/AcOEt); FTIR (neat film) 3448, 1616, 1283, 1028 cm<sup>-1</sup>. <sup>1</sup>H NMR (CDCl<sub>3</sub>) δ 7.15-7.32 (m, 10H), 6.35 (t, *J* = 2.3 Hz, 1H), 4.82 (t, *J* = 2.3 Hz, 1H), 4.35-4.56 (m, 2H), 4.43 (s, 2H), 3.35 (dd, *J* = 10.3, 6.4 Hz, 1H), 3.20 (dd, *J* = 10.3, 4.5 Hz, 1H), 3.10 (tt, *J* = 6.1, 2.0 Hz, 1H). <sup>13</sup>C NMR (CDCl<sub>3</sub>) δ 147.61, 142.21, 138.11, 128.64, 128.58, 127.95, 127.84, 126.33, 99.19, 82.25, 76.22, 73.44, 71.71, 53.12. Anal.Calcd for C<sub>19</sub>H<sub>20</sub>O<sub>3</sub>: C 77.00; H, 6.80. Found: C, 76.69; H, 6.61.

#### PCC Oxidation of Alcohols 16 and 17 (*R*=Me)

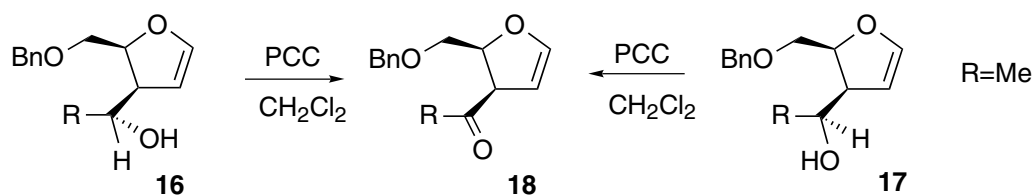

**(4*R*,5*S*)-5-(Benzyloxymethyl)-4-acetyl-4,5-dihydrofuran (18, *R*=Me)**. A solution of alcohol **16** (*R*=Me) (0.025 g, 0.11 mmol) in CH<sub>2</sub>Cl<sub>2</sub> (0.3 mL) was added at 0°C to a stirred solution of PCC (0.018 g, 0.11 mmol) in anhydrous CH<sub>2</sub>Cl<sub>2</sub> (0.48 mL) containing 4 Å molecular sieves (0.030 g) and AcONa (0.009 g, 0.11 mmol) and the reaction mixture was stirred for 18 h at rt. After dilution with Et<sub>2</sub>O (100 mL), stirring was prolonged for 30 min. The resulting reaction mixture was filtered through a pad of Celite and the organic solution was evaporated to afford a crude product (0.023 g) consisting of ketone **18** (*R*=Me) which was subjected to preparative TLC with 8:2 hexane/AcOEt as the eluant. Extraction of the most intense band afforded pure ketone **18** (*R*=Me) (0.019 g, 75% yield), as a liquid: *R*<sub>f</sub> = 0.29 (8:2 hexane/AcOEt); FTIR (neat film) 1715, 1616, 1259, 1093 cm<sup>-1</sup>. <sup>1</sup>H NMR (CDCl<sub>3</sub>) δ 7.23-7.42 (m, 5H), 6.40 (t, *J* = 2.4 Hz, 1H), 5.09-5.00 (m, 2H), 4.59 (s, 2H), 3.60-3.68 (m, 2H), 3.56 (unresolved d, *J* = 5.2 Hz, 1H), 2.19 (s, 3H). <sup>13</sup>C NMR (CDCl<sub>3</sub>) δ 206.19, 147.57, 138.10, 128.60, 127.88, 98.34, 80.79, 73.63, 71.37, 57.95, 29.88. Anal.Calcd for C<sub>14</sub>H<sub>16</sub>O<sub>3</sub>: C 72.39; H, 6.94. Found: C, 72.08; H, 7.01.

Application of the same procedure to diastereoisomeric alcohol **17** (*R*=Me) (0.025 g, 0.11 mmol) afforded a crude reaction product which was subjected to preparative TLC with 8:2

hexane/AcOEt as the eluant. Extraction of the most intense band afforded pure ketone **18** (R=Me) (0.021 g, 82% yield).

### PCC Oxidation of Alcohols **16** and **17** (R=Ph)

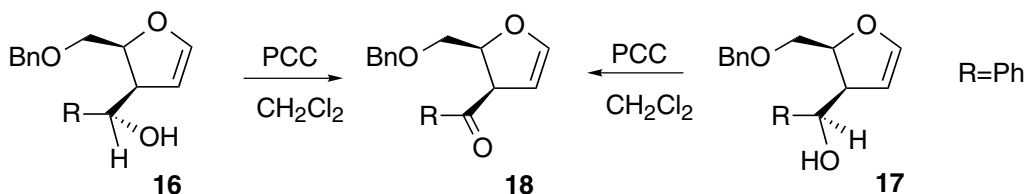

**(4R,5S)-5-(Benzyloxymethyl)-4-benzoyl-4,5-dihydrofuran (18, R=Ph)**. Application to alcohol **16** (R=Ph) (0.018 g, 0.061 mmol) of the procedure previously used for the corresponding reaction of alcohol **16** (R=Me) afforded a crude reaction product (0.017 g) which was subjected to preparative TLC with 8:2 hexane/AcOEt as the eluant. Extraction of the most intense band afforded pure ketone **18** (R=Ph) (0.013 g, 72% yield), as a liquid:  $R_f$  = 0.29 (8:2 hexane/AcOEt); FTIR (neat film) 1685, 1450, 1259, 1095, 1006  $\text{cm}^{-1}$ .  $^1\text{H}$  NMR ( $\text{CDCl}_3$ )  $\delta$  7.95-8.04 (m, 2H), 7.29-7.68 (m, 8H), 6.41 (t,  $J$  = 2.5 Hz, 1H), 5.38 (dd,  $J$  = 11.4, 5.0 Hz, 1H), 4.99 (t,  $J$  = 2.6 Hz, 1H), 4.63 (s, 2H), 4.51-4.68 (m, 1H), 3.66 (unresolved d,  $J$  = 5.0 Hz, 2H).  $^{13}\text{C}$  NMR ( $\text{CDCl}_3$ )  $\delta$  197.17, 147.25, 133.56, 128.88, 128.62, 127.96, 99.63, 81.10, 73.68, 71.11, 52.80. Anal. Calcd for  $\text{C}_{19}\text{H}_{18}\text{O}_3$ : C, 77.53; H, 6.16. Found: C, 77.21; H, 5.98.

Application of the same procedure to diastereoisomeric alcohol **17** (R=Ph) (0.015 g, 0.051 mmol) afforded a crude reaction product which was subjected to preparative TLC with 8:2 hexane/AcOEt as the eluant. Extraction of the most intense band afforded pure ketone **18** (R=Ph) (0.012 g, 80% yield).

### Reaction of Hydroxy Mesylate **3** with $\text{Me}_2\text{CuLi}$ (Protocol A)

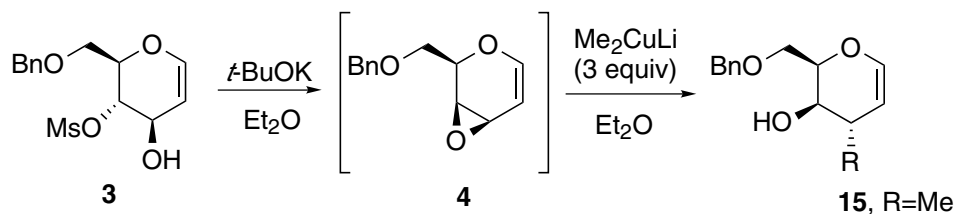

**6-O-(Benzyl)-3-deoxy-3-methyl-D-gulal (15, R=Me)**. A solution of hydroxy mesylate **3** (0.040 g, 0.13 mmol) in anhydrous  $\text{Et}_2\text{O}$  (2 mL) was treated with  $t$ -BuOK (0.015 g, 0.13 mmol). After 15 min stirring at rt, the reaction mixture was cooled at  $0^\circ\text{C}$  and treated with a 1

M solution of  $\text{Me}_2\text{CuLi}$  in anhydrous  $\text{Et}_2\text{O}$  (0.39 mL, 0.39 mmol) (prepared from 1.6 M  $\text{MeLi}$  in  $\text{Et}_2\text{O}$  and  $\text{CuI}$ ) and stirring was prolonged for 30 min at rt. Dilution with  $\text{Et}_2\text{O}$  (20 mL) and evaporation of the washed (saturated aqueous  $\text{NH}_4\text{Cl}$  and saturated aqueous  $\text{NaCl}$ ) organic solution afforded a crude product mostly consisting of glycal **15**,  $\text{R}=\text{Me}$  ( $^1\text{H}$  NMR) (0.025 g) which was subjected to flash chromatography. Elution with 7:3 hexane/ $\text{AcOEt}$  afforded pure alcohol **15** ( $\text{R}=\text{Me}$ ) (0.018 g, 59% yield), as a liquid:  $R_f=0.30$  (7:3 hexane/ $\text{AcOEt}$ ); FTIR (neat film) 3439, 1645, 1457, 1379, 1083  $\text{cm}^{-1}$ ;  $^1\text{H}$  NMR  $\delta$  7.23-7.40 (m, 5H), 6.41 (d,  $J=6.2$  Hz, 1H), 4.68-4.76 (m, 1H), 4.63 (d,  $J=12.2$  Hz, 1H), 4.57 (d,  $J=12.2$  Hz, 1H), 3.66-3.89 (m, 3H), 3.70 (d,  $J=6.4$  Hz, 1H), 2.06-2.25 (m, 1H), 1.02 (d,  $J=7.2$  Hz, 3H).  $^{13}\text{C}$  NMR  $\delta$  142.65, 137.75, 128.69, 128.05, 104.74, 74.08, 71.97, 71.13, 70.80, 33.79, 21.26. Anal.Calcd for  $\text{C}_{14}\text{H}_{18}\text{O}_3$ : C, 71.77; H, 7.74. Found: C, 72.06; H, 7.65.

### Reaction of Hydroxy Mesylate **3** with $\text{EtMgBr}/\text{CuCN}$ (Protocol A)

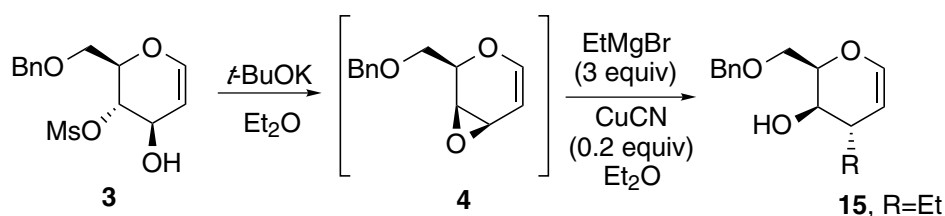

**6-O-(Benzyl)-3-deoxy-3-ethyl-D-gulal (15,  $\text{R}=\text{Et}$ ).** A 3 M solution of  $\text{EtMgBr}$  in  $\text{Et}_2\text{O}$  (0.16 mL, 0.48 mmol) was added at  $-40^\circ\text{C}$  to a suspension of  $\text{CuCN}$  (0.003 g, 0.032 mmol) in anhydrous  $\text{Et}_2\text{O}$  (0.5 mL) and the resulting reaction mixture was stirred for 30 min at the same temperature. This mixture was supplemented, via a syringe at  $-40^\circ\text{C}$ , with a solution of hydroxy mesylate **3** (0.050 g, 0.16 mmol) in anhydrous  $\text{Et}_2\text{O}$  (2 mL), previously left in contact with  $t\text{-BuOK}$  (0.021 g, 0.19 mmol) for 15 min under stirring at rt. After the addition was completed, the temperature was allowed to rise to rt and stirring was prolonged 1.5 h at this temperature. Dilution with  $\text{Et}_2\text{O}$  (20 mL) and evaporation of the washed (saturated aqueous  $\text{NaCl}$ ) organic solution afforded a crude reaction product (0.028 g) which was subjected to flash chromatography. Elution with 6:4 hexane/ $\text{AcOEt}$  afforded alcohol **15** ( $\text{R}=\text{Et}$ ), pure as a liquid (0.022 g, 55% yield):  $R_f=0.38$  (6:4 hexane/ $\text{AcOEt}$ ); FTIR (neat film) 3421, 1645, 1454, 1240, 1058  $\text{cm}^{-1}$ .  $^1\text{H}$  NMR ( $\text{CDCl}_3$ )  $\delta$  7.24-7.42 (m, 5H), 6.44 (dd,  $J=6.1, 1.3$  Hz, 1H), 4.74-4.84 (m, 1H), 4.64 (d,  $J=12.2$  Hz, 1H), 4.59 (d,  $J=12.2$  Hz, 1H), 3.69-3.89 (m, 4H), 1.85-2.03 (m, 1H), 1.15-1.50 (m, 2H), 0.96 (t,  $J=7.3$  Hz, 3H).  $^{13}\text{C}$  NMR  $\delta$  142.78, 137.78, 128.68, 128.02, 102.98, 74.05, 72.54, 71.16, 69.22, 40.90, 29.11, 11.41. Anal.Calcd for  $\text{C}_{15}\text{H}_{20}\text{O}_3$ : C, 72.55; H, 8.12. Found: C, 72.37; H, 7.92.



### Reaction of Hydroxy Mesylate **3** with PhMgCl (*Protocol A*)

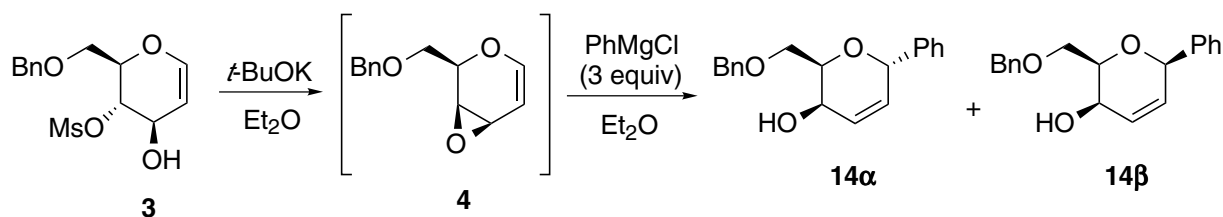

A solution of hydroxy mesylate **3** (0.077 g, 0.24 mmol) in anhydrous Et<sub>2</sub>O (4 mL), was treated with *t*-BuOK (0.030 g, 0.24 mmol). After 15 min stirring at rt, the reaction mixture was cooled at 0°C, treated with 2M PhMgCl in THF (0.36 mL, 0.72 mmol) and stirred 30 min at rt. Dilution with Et<sub>2</sub>O (20 mL) and evaporation of the washed (saturated aqueous NaCl) organic solution afforded a crude product (0.060 g) consisting of a 3:7 mixture (<sup>1</sup>H NMR) of the two diastereoisomeric C-glycosides **14α** and **14β** (<sup>1</sup>H NMR) which was subjected to preparative TLC with 6:4 hexane/AcOEt. Extraction of the two most intense bands afforded pure **14α** (0.014 g, 64% yield) and **14β** (0.035 g, 70% yield).

**(2R,5R,6R)-6-(benzyloxymethyl)-5-hydroxy-2-phenyl-2H-5,6-dihydropyran (14β)**, a liquid: R<sub>f</sub> = 0.44 (6:4 hexane/AcOEt); FTIR (neat film) 3421, 1645, 1454, 1068 cm<sup>-1</sup>; <sup>1</sup>H NMR (CDCl<sub>3</sub>) δ 7.27-7.40 (m, 10H), 6.15 (ddd, *J* = 10.2, 5.4, 2.2 Hz, 1H), 5.98 (dd, *J* = 10.2, 1.3 Hz, 1H), 5.13-5.19 (m, 1H), 4.64 (d, *J* = 12.0 Hz, 1H), 4.56 (d, *J* = 12.0 Hz, 1H), 3.89-4.09 (m, 2H), 3.80 (dd, *J* = 10.1, 5.3 Hz, 1H), 3.74 (dd, *J* = 10.1, 6.5 Hz, 1H). <sup>13</sup>C NMR (CDCl<sub>3</sub>) δ 140.19, 138.29, 134.04, 128.73, 128.56, 128.30, 127.95, 127.83, 127.29, 126.94, 78.09, 77.80, 73.78, 70.09, 62.75. Anal. Calcd for C<sub>19</sub>H<sub>20</sub>O<sub>3</sub>: C, 77.00; H, 6.80. Found: C, 77.12; H, 6.60.

**(2S,5R,6R)-6-(benzyloxymethyl)-5-hydroxy-2-phenyl-2H-5,6-dihydropyran (14α)**, a liquid: R<sub>f</sub> = 0.31 (6:4 hexane/AcOEt); FTIR (neat film) 3356, 1655, 1595, 1471, 1236, 1080 cm<sup>-1</sup>; <sup>1</sup>H NMR (CDCl<sub>3</sub>) δ 7.20-7.45 (m, 10H), 6.19-6.33 (m, 2H), 5.35 (s, 1H), 4.50 (s, 2H), 3.89-3.99 (m, 1H), 3.59-3.86 (m, 3H). <sup>13</sup>C NMR (CDCl<sub>3</sub>) δ 139.02, 138.30, 131.39, 128.59, 128.55, 128.13, 128.05, 127.93, 127.80, 74.37, 73.58, 70.87, 70.03, 62.87. Anal. Calcd for C<sub>19</sub>H<sub>20</sub>O<sub>3</sub>: C, 77.00; H, 6.80. Found: C, 76.69; H, 6.65.

### Reaction of Hydroxy Mesylate **3** with MeLi (*Protocol A*)

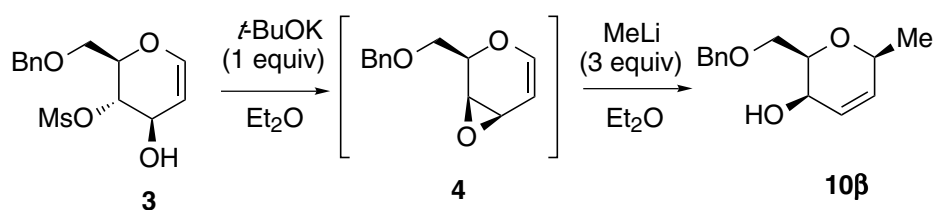

#### (2*S*,5*R*,6*R*)-6-(Benzyloxymethyl)-5-hydroxy-2-methyl-2*H*-5,6-dihydropyran (**10β**).

*Typical procedure.* A solution of hydroxy mesylate **3** (0.044 g, 0.14 mmol) in anhydrous Et<sub>2</sub>O (2 mL), was treated with *t*-BuOK (0.019 g, 0.17 mmol). After 15 min stirring at rt, the reaction mixture was cooled at 0°C, treated with 1.6 M MeLi in Et<sub>2</sub>O (0.26 mL, 0.42 mmol) and stirred at the same temperature for 30 min. Dilution with Et<sub>2</sub>O (20 mL) and evaporation of the washed (saturated aqueous NaCl) organic solution afforded a crude product (0.038 g) consisting of practically pure β-*C*-glycoside **10β** (<sup>1</sup>H NMR) which was subjected to flash chromatography. Elution with 6:4 hexane/AcOEt afforded pure **10β** (0.032 g, 80% yield), as a liquid: *R*<sub>f</sub> = 0.22 (7:3 hexane/AcOEt); FTIR (neat film) 3427, 1643, 1446, 1375, 1091 cm<sup>-1</sup>; <sup>1</sup>H NMR (CDCl<sub>3</sub>) δ 7.21-7.34 (m, 5H), 5.99 (ddd, *J* = 10.2, 5.4, 2.1 Hz, 1H), 5.85 (d, *J* = 10.2 Hz, 1H), 4.64 (d, *J* = 12.0 Hz, 1H), 4.54 (d, *J* = 12.0 Hz, 1H), 4.32-4.15 (m, 1H), 3.88 (broad singlet, *W*<sub>1/2</sub> = 15.4 Hz, 1H), 3.74-3.67 (m, 3H), 1.28 (d, *J* = 6.8 Hz, 3H). <sup>13</sup>C NMR (CDCl<sub>3</sub>) δ 138.36, 135.67, 128.58, 128.01, 127.85, 126.52, 73.79, 71.74, 70.26, 63.10, 21.19. Anal. Calcd for C<sub>14</sub>H<sub>18</sub>O<sub>3</sub>: C 71.77; H 7.74. Found: C, 71.97; H, 7.45.

### Reaction of Hydroxy Mesylate **3** with BuLi (*Protocol A*)

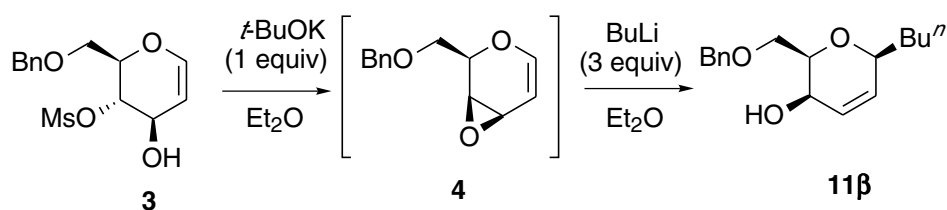

#### (2*S*,5*R*,6*R*)-6-(Benzyloxymethyl)-5-hydroxy-2-butyl-2*H*-5,6-dihydropyran (**11β**).

Proceeding as previously described for the corresponding reaction with MeLi, the treatment of hydroxy mesylate **3** (0.050 g, 0.16 mmol) in anhydrous Et<sub>2</sub>O (2 mL) with *t*-BuOK (0.021 g, 0.19 mmol) and 1.6 M BuLi in hexane (0.30 mL, 0.48 mmol) afforded a crude liquid product (0.036 g, 81% yield) consisting of practically pure β-*C*-glycoside **11β** (<sup>1</sup>H NMR) which was subjected to preparative TLC with 8:2 hexane/AcOEt. Extraction of the most intense band afforded pure **11β** (0.014 g, 32% yield), as a liquid: *R*<sub>f</sub> = 0.27 (hexane/AcOEt 8:2); FTIR (neat film) 3431, 1645, 1091 cm<sup>-1</sup>. <sup>1</sup>H NMR (CDCl<sub>3</sub>) δ 7.24-

7.41 (m, 5H), 6.02 (ddd,  $J = 10.2, 5.3, 2.1$  Hz, 1H), 5.85 (d,  $J = 10.2$  Hz, 1H), 4.65 (d,  $J = 12.2$  Hz, 1H), 4.58 (d,  $J = 12.2$  Hz, 1H), 4.05-4.15 (m, 1H), 3.84-3.95 (m, 1H), 3.65-3.82 (m, 3H), 1.20-1.71 (m, 6H), 0.91 (t,  $J = 6.8$  Hz, 3H).  $^{13}\text{C}$  NMR ( $\text{CDCl}_3$ )  $\delta$  138.47, 134.72, 128.57, 127.94, 127.82, 126.90, 77.43, 75.56, 73.74, 70.25, 63.32, 34.99, 27.34, 22.89, 14.23. Anal. Calcd for  $\text{C}_{17}\text{H}_{24}\text{O}_3$ : C, 73.88; H, 8.75. Found: C, 73.95, H, 8.61.

#### Reaction of Hydroxy Mesylate **3** with *i*-PrLi (Protocol A)

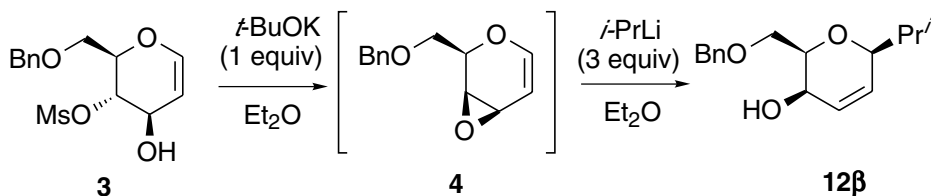

**(2S,5R,6R)-6-(Benzyloxymethyl)-5-hydroxy-2-(1-methylethyl)-2H-5,6-dihydropyran (12β).** Proceeding as previously described for the corresponding reaction with MeLi, the treatment of hydroxy mesylate **3** (0.070 g, 0.22 mmol) in anhydrous  $\text{Et}_2\text{O}$  (2 mL) with *t*-BuOK (0.030 g, 0.26 mmol) and 0.7 M *i*-PrLi in pentane (0.94 mL, 0.66 mmol) afforded a crude product (0.050 g) consisting of practically pure **12β** which was subjected to flash chromatography. Elution with 8:2 hexane/AcOEt afforded pure **12β** (0.045 g, 78% yield), as a liquid:  $R_f = 0.44$  (8:2 hexane/AcOEt); FTIR (neat film) 3452, 1647, 1261, 1095  $\text{cm}^{-1}$ .  $^1\text{H}$  NMR ( $\text{CDCl}_3$ )  $\delta$  7.24-7.42 (m, 5H), 6.07 (ddd,  $J = 10.1, 5.4, 2.0$  Hz, 1H), 5.86 (d,  $J = 10.1$  Hz, 1H), 4.63 (d,  $J = 12.2$  Hz, 1H), 4.58 (d,  $J = 12.2$  Hz, 1H), 3.63-4.01 (m, 5H), 1.75-1.97 (m, 1H), 0.95 (d,  $J = 2.5$  Hz, 3H), 0.92 (d,  $J = 2.5$  Hz, 3H).  $^{13}\text{C}$  NMR ( $\text{CDCl}_3$ )  $\delta$  138.63, 132.85, 128.66, 128.00, 127.88, 80.10, 76.66, 73.83, 70.37, 63.47, 32.40, 18.25, 17.88. Anal. Calcd for  $\text{C}_{16}\text{H}_{22}\text{O}_3$ : C, 73.25; H, 8.45. Found: C, 73.59, H, 8.17.

#### Reaction of Hydroxy Mesylate **3** with *t*-BuLi (Protocol A)

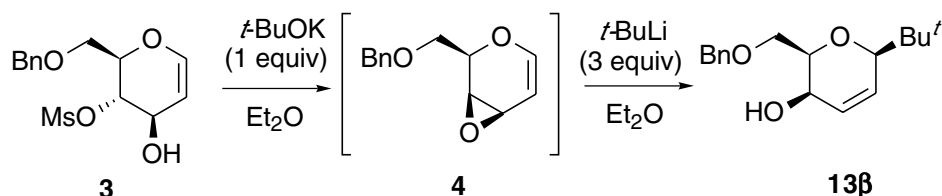

**(2R,5R,6R)-6-(Benzyloxymethyl)-5-hydroxy-2-(1,1-dimethylethyl)-2H-5,6-dihydropyran (13β).** Proceeding as previously described for the corresponding reaction with MeLi, the treatment of hydroxy mesylate **3** (0.045 g, 0.14 mmol) in anhydrous  $\text{Et}_2\text{O}$  (2

mL) with *t*-BuOK (0.019 g, 0.17 mmol) and 1.7 M *t*-BuLi in pentane (0.25 mL, 0.42 mmol) afforded a crude product (0.038 g) mostly consisting of **13 $\beta$**  which was purified by flash chromatography. Elution with a 8:2 hexane/AcOEt afforded pure **13 $\beta$**  (0.031 g, 80% yield), as a liquid:  $R_f$  = 0.32 (8:2 hexane/AcOEt); FTIR (neat film) 3448, 1645, 1462, 1365, 1093  $\text{cm}^{-1}$ ;  $^1\text{H}$  NMR ( $\text{CDCl}_3$ )  $\delta$  7.25-7.40 (m, 5H), 6.11 (ddd,  $J$  = 10.4, 5.6, 2.2 Hz, 1H), 5.97 (d,  $J$  = 10.3 Hz, 1H), 4.62 (s, 2H), 3.82-3.95 (m, 1H), 3.61-3.81 (m, 4H), 0.95 (s, 9H).  $^{13}\text{C}$  NMR ( $\text{CDCl}_3$ )  $\delta$  138.67, 134.71, 131.80, 128.55, 128.39, 127.79, 83.14, 77.02, 73.70, 70.34, 63.20, 34.48, 25.97. Anal.Calcd for  $\text{C}_{17}\text{H}_{24}\text{O}_3$ : C, 73.88; H, 8.75. Found: C, 74.08. H, 8.55.

### Reaction of Hydroxy Mesylate **3** with PhLi (*Protocol A*)

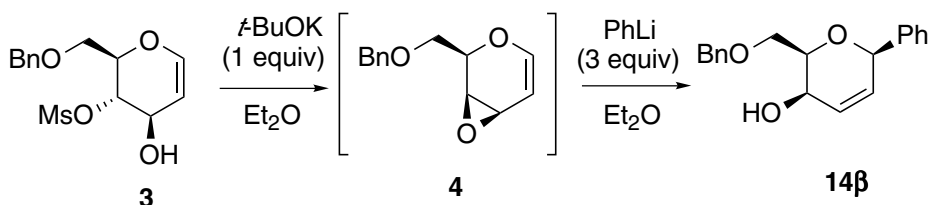

Proceeding as previously described for the corresponding reaction with MeLi, the treatment of hydroxy mesylate **3** (0.062 g, 0.20 mmol) in anhydrous  $\text{Et}_2\text{O}$  (2 mL) with *t*-BuOK (0.027 g, 0.24 mmol) and 1.8 M PhLi in  $\text{Et}_2\text{O}$  (0.33 mL, 0.60 mmol) afforded a crude liquid product (0.055 g, 93% yield) consisting of  $\beta$ -C-glycoside **14 $\beta$**  ( $^1\text{H}$  NMR), practically pure as a liquid.

### References

- 1) Brimacombe, J.S.; Da'Aboul, J.; Tucker, L.C.N. *Carbohydr. Res.* **1971**, *19*, 276.
- 2) Deshpande, P.P.; Kim, H.M.; Zatorski, A.; Park, T.-K.; Ragupathi, G.; Livingston, P.O.; Live, D.; Danishefsky, S.J. *J. Am. Chem. Soc.* **1998**, *120*, 1600.
